# Supplementary material for: Disparities in Snacking Trends in US Adults over a 35 Year Period from 1977 to 2012
Source: Nutrients. 2017 Jul 27;9(8):809. doi: 10.3390/nu9080809 (PMC5579603; doi:10.3390/nu9080809)

**Supplementary Table S1.** Sociodemographic characteristics for US adults ages ≥19 years from the 1977–1978 Nationwide Food Consumption Survey (NFCS); the 1989–1991 Continuing Survey of Food Intake by Individuals (CSFII), the 1994–1996 CSFII, the 1997-1998 CSFII, NHANES 2003–2004, NHANES 2005– 2006, NHANES 2009-2010 and NHANES 2011-2012.

|                                                  | NFCS<br>1977-78 | CSFII<br>1989-91 | CSFII<br>1994-98 | NHANES<br>2003-06 | NHANES<br>2009-12 |
|--------------------------------------------------|-----------------|------------------|------------------|-------------------|-------------------|
| Number of observations                           | 29,715          | 11,877           | 10,019           | 10,577            | 12,103            |
| Female (%)                                       | 53.6            | 56.3             | 48.8             | 51.9              | 51.0              |
| Male (%)                                         | 46.4            | 43.7             | 51.2             | 48.1              | 49.0              |
| Hispanic (%)                                     | 5.6             | 8.9              | 8.9              | 23.5              | 24.7              |
| Non-Hispanic white (%)                           | 80.9            | 75.5             | 79.3             | 39.4              | 42.2              |
| Non-Hispanic black (%)                           | 12.4            | 12.6             | 11.2             | 26.3              | 22.2              |
| Other race (%)                                   | 1.1             | 3.0              | 0.6              | 4.8               | 11.0              |
| <185% national poverty level (%)                 | 29.2            | 51.9             | 35.0             | 39.6              | 44.6              |
| 185-350 % national poverty level (%)             | 36.7            | 23.7             | 27.9             | 24.8              | 19.7              |
| >350% national poverty level (%)                 | 34.1            | 24.4             | 37.1             | 29.8              | 26.1              |
| Household's education <= high school diploma (%) | 24.1            | 30.4             | 21.0             | 29.0              | 26.4              |
| Household's education >= high school diploma (%) | 75.7            | 69.6             | 77.4             | 70.8              | 73.5              |

**Supplementary Table S2.** Ranking of food and beverage sources of snacks by ethnic group (2009–2012).

| <b>Snack food source</b>                  | <b>Hispanic</b> | <b>NH White</b> | <b>NH Black</b> | <b>Other Race</b> |
|-------------------------------------------|-----------------|-----------------|-----------------|-------------------|
| Desserts and sweets                       | 1               | 1               | 1               | 1                 |
| Fruit, fresh, frozen, canned, or dried    | 2               | 6               | 6               | 2                 |
| Sugar sweetened beverages                 | 3               | 4               | 3               | 5                 |
| Beer                                      | 4               | 5               | 4               | 6                 |
| Salty snacks                              | 5               | 2               | 2               | 3                 |
| Corn and flour tortilla/corn-based dishes | 6               | 9               | -               | -                 |
| Fluid milk                                | 7               | 7               | -               | 8                 |
| Nuts, nut butters, seeds, & coconut       | 8               | 3               | 5               | 4                 |
| Coffee/tea                                | 9               | 8               | 8               | 7                 |
| Breads and rolls, mostly unsweetened      | 10              | -               | 7               | 9                 |
| Cheese & cheese products                  | -               | 10              | -               | -                 |
| Liquor                                    | -               | -               | 9               | -                 |
| Juices                                    | -               | -               | 10              | 10                |

**Figure S1.** Per capita daily energy intake (kcal) for snacks by race/ethnicity for US adults between 1977–1978 and 2009–2012. \* Significantly different to all racial-ethnic groups,  $p < 0.01$ . \*\* Significantly different to non-Hispanic White,  $p < 0.01$ .

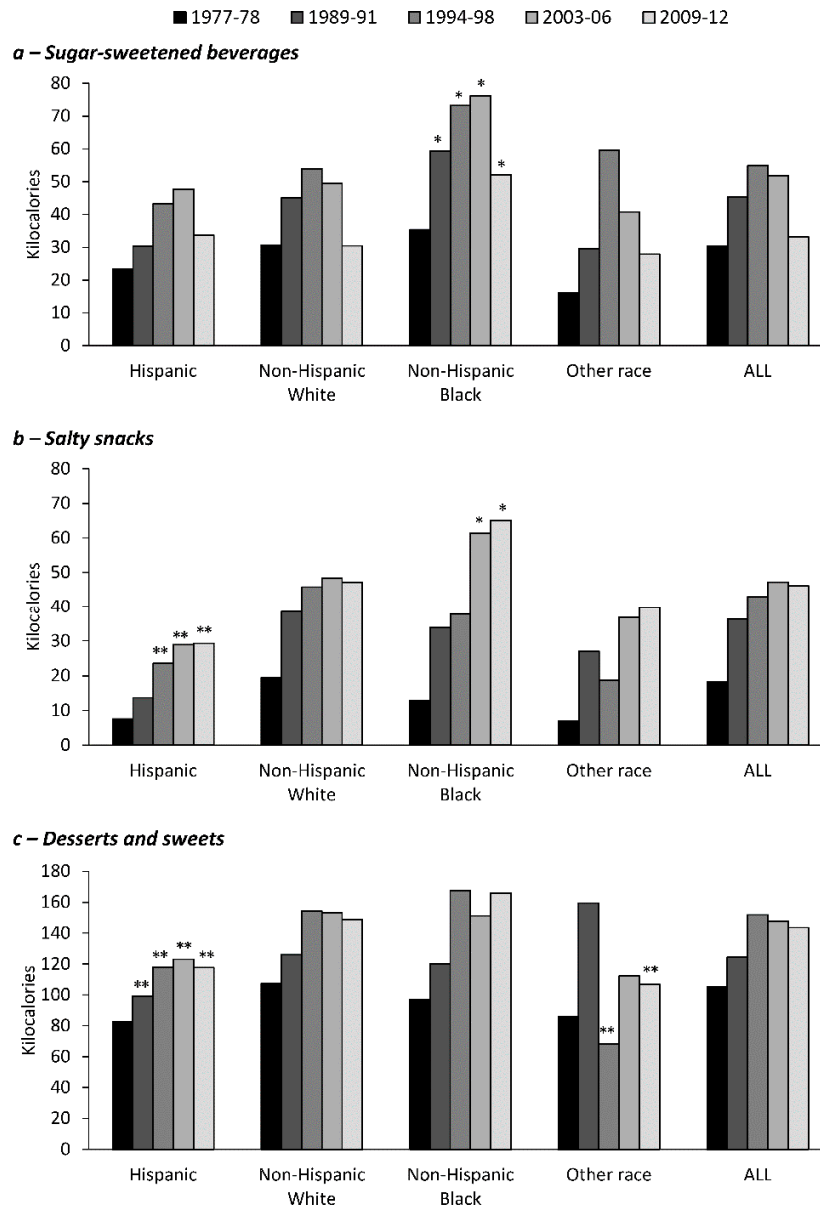

Supplement: Supplementary file 1 [file nutrients-09-00809-s001.pdf]
